# Supplementary material for: Development of an Anoikis-Related Gene Signature for Lung Squamous Cell Carcinomato Predict Prognosis, Immune Landscape, and Immunotherapy Response
Source: Hindawi journal article supplement (doi:10.1155/2023/7633347), 2023-12-09
Supplement: f1 [file 7633347.f1.pdf]

## The 357 anoikis-related genes

| Gene Sym | Description  | Category   | Gifts | GC Id       | Relevance | GeneCards Link                                                                |
|----------|--------------|------------|-------|-------------|-----------|-------------------------------------------------------------------------------|
| BRMS1    | BRMS1 Tr     | Protein Co |       | 38 GC11M09  | 14.7102   | <a href="https://www.genecards.org/cgi-l">https://www.genecards.org/cgi-l</a> |
| PTK2     | Protein Ty   | Protein Co |       | 50 GC08M14  | 7.287515  | <a href="https://www.genecards.org/cgi-l">https://www.genecards.org/cgi-l</a> |
| NTRK2    | Neurotrop    | Protein Co |       | 56 GC09P084 | 7.26254   | <a href="https://www.genecards.org/cgi-l">https://www.genecards.org/cgi-l</a> |
| BCL2L11  | BCL2 Like    | Protein Co |       | 47 GC02P111 | 6.691599  | <a href="https://www.genecards.org/cgi-l">https://www.genecards.org/cgi-l</a> |
| SRC      | SRC Proto    | Protein Co |       | 54 GC20P037 | 6.184272  | <a href="https://www.genecards.org/cgi-l">https://www.genecards.org/cgi-l</a> |
| CEACAM6  | CEA Cell A   | Protein Co |       | 44 GC19P041 | 6.103184  | <a href="https://www.genecards.org/cgi-l">https://www.genecards.org/cgi-l</a> |
| CAV1     | Caveolin 1   | Protein Co |       | 51 GC07P116 | 5.463298  | <a href="https://www.genecards.org/cgi-l">https://www.genecards.org/cgi-l</a> |
| AKT1     | AKT Serine   | Protein Co |       | 56 GC14M10  | 5.40746   | <a href="https://www.genecards.org/cgi-l">https://www.genecards.org/cgi-l</a> |
| ITGB1    | Integrin S   | Protein Co |       | 53 GC10M03  | 5.002957  | <a href="https://www.genecards.org/cgi-l">https://www.genecards.org/cgi-l</a> |
| CEACAM5  | CEA Cell A   | Protein Co |       | 45 GC19P069 | 4.655791  | <a href="https://www.genecards.org/cgi-l">https://www.genecards.org/cgi-l</a> |
| EGFR     | Epidermal    | Protein Co |       | 58 GC07P055 | 4.615613  | <a href="https://www.genecards.org/cgi-l">https://www.genecards.org/cgi-l</a> |
| BCL2     | BCL2 Apo     | Protein Co |       | 53 GC18M06  | 4.541405  | <a href="https://www.genecards.org/cgi-l">https://www.genecards.org/cgi-l</a> |
| CASP8    | Caspase 8    | Protein Co |       | 55 GC02P201 | 4.488767  | <a href="https://www.genecards.org/cgi-l">https://www.genecards.org/cgi-l</a> |
| SIK1     | Salt Induci  | Protein Co |       | 48 GC21M04  | 4.375074  | <a href="https://www.genecards.org/cgi-l">https://www.genecards.org/cgi-l</a> |
| PTRH2    | Peptidyl-T   | Protein Co |       | 45 GC17M05  | 4.192896  | <a href="https://www.genecards.org/cgi-l">https://www.genecards.org/cgi-l</a> |
| STAT3    | Signal Tran  | Protein Co |       | 56 GC17M04  | 4.140685  | <a href="https://www.genecards.org/cgi-l">https://www.genecards.org/cgi-l</a> |
| TLE1     | TLE Family   | Protein Co |       | 47 GC09M08  | 4.070988  | <a href="https://www.genecards.org/cgi-l">https://www.genecards.org/cgi-l</a> |
| DAPK2    | Death Ass    | Protein Co |       | 43 GC15M06  | 3.988476  | <a href="https://www.genecards.org/cgi-l">https://www.genecards.org/cgi-l</a> |
| CTNNB1   | Catenin B    | Protein Co |       | 56 GC03P041 | 3.976931  | <a href="https://www.genecards.org/cgi-l">https://www.genecards.org/cgi-l</a> |
| ZNF304   | Zinc Finge   | Protein Co |       | 32 GC19P057 | 3.940119  | <a href="https://www.genecards.org/cgi-l">https://www.genecards.org/cgi-l</a> |
| MAPK1    | Mitogen-/    | Protein Co |       | 54 GC22M02  | 3.734493  | <a href="https://www.genecards.org/cgi-l">https://www.genecards.org/cgi-l</a> |
| BMF      | Bcl2 Modif   | Protein Co |       | 40 GC15M04  | 3.73254   | <a href="https://www.genecards.org/cgi-l">https://www.genecards.org/cgi-l</a> |
| ITGA5    | Integrin S   | Protein Co |       | 52 GC12M05  | 3.677547  | <a href="https://www.genecards.org/cgi-l">https://www.genecards.org/cgi-l</a> |
| TP53     | Tumor Prc    | Protein Co |       | 55 GC17M00  | 3.639736  | <a href="https://www.genecards.org/cgi-l">https://www.genecards.org/cgi-l</a> |
| MCL1     | MCL1 Apo     | Protein Co |       | 50 GC01M15  | 3.579083  | <a href="https://www.genecards.org/cgi-l">https://www.genecards.org/cgi-l</a> |
| BCL2L1   | BCL2 Like    | Protein Co |       | 50 GC20M03  | 3.362039  | <a href="https://www.genecards.org/cgi-l">https://www.genecards.org/cgi-l</a> |
| CASP3    | Caspase 3    | Protein Co |       | 52 GC04M18  | 3.11994   | <a href="https://www.genecards.org/cgi-l">https://www.genecards.org/cgi-l</a> |
| CDH1     | Cadherin 1   | Protein Co |       | 52 GC16P068 | 3.059575  | <a href="https://www.genecards.org/cgi-l">https://www.genecards.org/cgi-l</a> |
| BAD      | BCL2 Asso    | Protein Co |       | 47 GC11M09  | 2.96305   | <a href="https://www.genecards.org/cgi-l">https://www.genecards.org/cgi-l</a> |
| PIK3CA   | Phosphatic   | Protein Co |       | 55 GC03P179 | 2.942048  | <a href="https://www.genecards.org/cgi-l">https://www.genecards.org/cgi-l</a> |
| PAK1     | P21 (RAC1    | Protein Co |       | 52 GC11M09  | 2.93086   | <a href="https://www.genecards.org/cgi-l">https://www.genecards.org/cgi-l</a> |
| ITGAV    | Integrin S   | Protein Co |       | 51 GC02P186 | 2.875284  | <a href="https://www.genecards.org/cgi-l">https://www.genecards.org/cgi-l</a> |
| FN1      | Fibronecti   | Protein Co |       | 52 GC02M21  | 2.821428  | <a href="https://www.genecards.org/cgi-l">https://www.genecards.org/cgi-l</a> |
| MAPK3    | Mitogen-/    | Protein Co |       | 51 GC16M03  | 2.729859  | <a href="https://www.genecards.org/cgi-l">https://www.genecards.org/cgi-l</a> |
| PTGS2    | Prostaglan   | Protein Co |       | 51 GC01M18  | 2.692126  | <a href="https://www.genecards.org/cgi-l">https://www.genecards.org/cgi-l</a> |
| BAX      | BCL2 Asso    | Protein Co |       | 52 GC19P048 | 2.548128  | <a href="https://www.genecards.org/cgi-l">https://www.genecards.org/cgi-l</a> |
| BCAR1    | BCAR1 Sca    | Protein Co |       | 46 GC16M07  | 2.548128  | <a href="https://www.genecards.org/cgi-l">https://www.genecards.org/cgi-l</a> |
| PTEN     | Phosphata    | Protein Co |       | 54 GC10P093 | 2.518463  | <a href="https://www.genecards.org/cgi-l">https://www.genecards.org/cgi-l</a> |
| ERBB2    | Erb-B2 Re    | Protein Co |       | 58 GC17P039 | 2.433978  | <a href="https://www.genecards.org/cgi-l">https://www.genecards.org/cgi-l</a> |
| ANGPTL4  | Angiopoie    | Protein Co |       | 47 GC19P008 | 2.417242  | <a href="https://www.genecards.org/cgi-l">https://www.genecards.org/cgi-l</a> |
| PDK4     | Pyruvate L   | Protein Co |       | 46 GC07M09  | 2.415361  | <a href="https://www.genecards.org/cgi-l">https://www.genecards.org/cgi-l</a> |
| CYCS     | Cytochron    | Protein Co |       | 51 GC07M02  | 2.339439  | <a href="https://www.genecards.org/cgi-l">https://www.genecards.org/cgi-l</a> |
| BRAF     | B-Raf Prot   | Protein Co |       | 55 GC07M14  | 2.335299  | <a href="https://www.genecards.org/cgi-l">https://www.genecards.org/cgi-l</a> |
| YAP1     | Yes1 Asso    | Protein Co |       | 50 GC11P102 | 2.33217   | <a href="https://www.genecards.org/cgi-l">https://www.genecards.org/cgi-l</a> |
| ANKRD13  | Ankyrin R    | Protein Co |       | 34 GC01M07  | 2.329537  | <a href="https://www.genecards.org/cgi-l">https://www.genecards.org/cgi-l</a> |
| ITGA2    | Integrin S   | Protein Co |       | 49 GC05P052 | 2.298167  | <a href="https://www.genecards.org/cgi-l">https://www.genecards.org/cgi-l</a> |
| ANXA5    | Annexin A    | Protein Co |       | 48 GC04M12  | 2.265912  | <a href="https://www.genecards.org/cgi-l">https://www.genecards.org/cgi-l</a> |
| BIRC5    | Baculovira   | Protein Co |       | 48 GC17P078 | 2.255684  | <a href="https://www.genecards.org/cgi-l">https://www.genecards.org/cgi-l</a> |
| MTOR     | Mechanist    | Protein Co |       | 56 GC01M01  | 2.249703  | <a href="https://www.genecards.org/cgi-l">https://www.genecards.org/cgi-l</a> |
| TIMP1    | TIMP Met     | Protein Co |       | 47 GC0XP047 | 2.24534   | <a href="https://www.genecards.org/cgi-l">https://www.genecards.org/cgi-l</a> |
| BDNF     | Brain Deriv  | Protein Co |       | 52 GC11M02  | 2.221462  | <a href="https://www.genecards.org/cgi-l">https://www.genecards.org/cgi-l</a> |
| CSPG4    | Chondroiti   | Protein Co |       | 50 GC15M07  | 2.195114  | <a href="https://www.genecards.org/cgi-l">https://www.genecards.org/cgi-l</a> |
| BSG      | Basigin (O   | Protein Co |       | 47 GC19P000 | 2.195114  | <a href="https://www.genecards.org/cgi-l">https://www.genecards.org/cgi-l</a> |
| AKT2     | AKT Serine   | Protein Co |       | 56 GC19M04  | 2.182597  | <a href="https://www.genecards.org/cgi-l">https://www.genecards.org/cgi-l</a> |
| STK11    | Serine/Thr   | Protein Co |       | 53 GC19P001 | 2.150353  | <a href="https://www.genecards.org/cgi-l">https://www.genecards.org/cgi-l</a> |
| IGF1     | Insulin Like | Protein Co |       | 50 GC12M10  | 2.147692  | <a href="https://www.genecards.org/cgi-l">https://www.genecards.org/cgi-l</a> |

|          |                         |    |          |          |                                                                               |
|----------|-------------------------|----|----------|----------|-------------------------------------------------------------------------------|
| IGF1R    | Insulin Like Protein Co | 57 | GC15P098 | 2.146957 | <a href="https://www.genecards.org/cgi-l">https://www.genecards.org/cgi-l</a> |
| ITGA6    | Integrin Su Protein Co  | 52 | GC02P172 | 2.10977  | <a href="https://www.genecards.org/cgi-l">https://www.genecards.org/cgi-l</a> |
| ILK      | Integrin Li Protein Co  | 48 | GC11P006 | 2.083155 | <a href="https://www.genecards.org/cgi-l">https://www.genecards.org/cgi-l</a> |
| CFLAR    | CASP8 An Protein Co     | 46 | GC02P201 | 2.083022 | <a href="https://www.genecards.org/cgi-l">https://www.genecards.org/cgi-l</a> |
| RHOA     | Ras Homo Protein Co     | 52 | GC03M049 | 2.068578 | <a href="https://www.genecards.org/cgi-l">https://www.genecards.org/cgi-l</a> |
| HIF1A    | Hypoxia In Protein Co   | 51 | GC14P061 | 2.064971 | <a href="https://www.genecards.org/cgi-l">https://www.genecards.org/cgi-l</a> |
| DAP3     | Death Ass Protein Co    | 42 | GC01P155 | 2.0553   | <a href="https://www.genecards.org/cgi-l">https://www.genecards.org/cgi-l</a> |
| MYBBP1A  | MYB Bind Protein Co     | 41 | GC17M004 | 2.020877 | <a href="https://www.genecards.org/cgi-l">https://www.genecards.org/cgi-l</a> |
| TLE5     | TLE Family Protein Co   | 39 | GC19M006 | 1.998172 | <a href="https://www.genecards.org/cgi-l">https://www.genecards.org/cgi-l</a> |
| ITGA3    | Integrin Su Protein Co  | 51 | GC17P050 | 1.998085 | <a href="https://www.genecards.org/cgi-l">https://www.genecards.org/cgi-l</a> |
| PTK2B    | Protein Ty Protein Co   | 51 | GC08P027 | 1.99505  | <a href="https://www.genecards.org/cgi-l">https://www.genecards.org/cgi-l</a> |
| CCND1    | Cyclin D1 Protein Co    | 55 | GC11P069 | 1.981372 | <a href="https://www.genecards.org/cgi-l">https://www.genecards.org/cgi-l</a> |
| CTTN     | Cortactin Protein Co    | 45 | GC11P070 | 1.981372 | <a href="https://www.genecards.org/cgi-l">https://www.genecards.org/cgi-l</a> |
| CALR     | Calreticulir Protein Co | 54 | GC19P012 | 1.944715 | <a href="https://www.genecards.org/cgi-l">https://www.genecards.org/cgi-l</a> |
| ATF4     | Activating Protein Co   | 47 | GC22P039 | 1.944715 | <a href="https://www.genecards.org/cgi-l">https://www.genecards.org/cgi-l</a> |
| CDCP1    | CUB Dom Protein Co      | 41 | GC03M049 | 1.931936 | <a href="https://www.genecards.org/cgi-l">https://www.genecards.org/cgi-l</a> |
| PLAUR    | Plasminog Protein Co    | 47 | GC19M049 | 1.907844 | <a href="https://www.genecards.org/cgi-l">https://www.genecards.org/cgi-l</a> |
| SKP2     | S-Phase K Protein Co    | 46 | GC05P036 | 1.907844 | <a href="https://www.genecards.org/cgi-l">https://www.genecards.org/cgi-l</a> |
| CHEK2    | Checkpoin Protein Co    | 56 | GC22M028 | 1.907213 | <a href="https://www.genecards.org/cgi-l">https://www.genecards.org/cgi-l</a> |
| HGF      | Hepatocyt Protein Co    | 54 | GC07M089 | 1.883366 | <a href="https://www.genecards.org/cgi-l">https://www.genecards.org/cgi-l</a> |
| E2F1     | E2F Transc Protein Co   | 45 | GC20M039 | 1.879978 | <a href="https://www.genecards.org/cgi-l">https://www.genecards.org/cgi-l</a> |
| EGF      | Epidermal Protein Co    | 54 | GC04P109 | 1.870717 | <a href="https://www.genecards.org/cgi-l">https://www.genecards.org/cgi-l</a> |
| PIK3CG   | Phosphatic Protein Co   | 50 | GC07P106 | 1.86744  | <a href="https://www.genecards.org/cgi-l">https://www.genecards.org/cgi-l</a> |
| ITGB4    | Integrin Su Protein Co  | 52 | GC17P075 | 1.855637 | <a href="https://www.genecards.org/cgi-l">https://www.genecards.org/cgi-l</a> |
| DAPK1    | Death Ass Protein Co    | 52 | GC09P087 | 1.845545 | <a href="https://www.genecards.org/cgi-l">https://www.genecards.org/cgi-l</a> |
| MAPK8    | Mitogen- / Protein Co   | 52 | GC10P048 | 1.839446 | <a href="https://www.genecards.org/cgi-l">https://www.genecards.org/cgi-l</a> |
| PIK3R1   | Phosphoin Protein Co    | 53 | GC05P068 | 1.820627 | <a href="https://www.genecards.org/cgi-l">https://www.genecards.org/cgi-l</a> |
| PIK3R3   | Phosphoin Protein Co    | 45 | GC01M046 | 1.81566  | <a href="https://www.genecards.org/cgi-l">https://www.genecards.org/cgi-l</a> |
| MAP2K1   | Mitogen- / Protein Co   | 55 | GC15P066 | 1.79616  | <a href="https://www.genecards.org/cgi-l">https://www.genecards.org/cgi-l</a> |
| CXCL12   | C-X-C Mo Protein Co     | 46 | GC10M044 | 1.77687  | <a href="https://www.genecards.org/cgi-l">https://www.genecards.org/cgi-l</a> |
| LGALS3   | Galectin 3 Protein Co   | 48 | GC14P055 | 1.741451 | <a href="https://www.genecards.org/cgi-l">https://www.genecards.org/cgi-l</a> |
| FBXW7-AS | FBXW7 An RNA Gene       | 15 | GC04P152 | 1.73386  | <a href="https://www.genecards.org/cgi-l">https://www.genecards.org/cgi-l</a> |
| BAK1     | BCL2 Anta Protein Co    | 47 | GC06M039 | 1.730096 | <a href="https://www.genecards.org/cgi-l">https://www.genecards.org/cgi-l</a> |
| ABHD4    | Abhydrola Protein Co    | 41 | GC14P033 | 1.706411 | <a href="https://www.genecards.org/cgi-l">https://www.genecards.org/cgi-l</a> |
| CD44     | CD44 Mol Protein Co     | 50 | GC11P035 | 1.702935 | <a href="https://www.genecards.org/cgi-l">https://www.genecards.org/cgi-l</a> |
| ITGA4    | Integrin Su Protein Co  | 50 | GC02P181 | 1.689653 | <a href="https://www.genecards.org/cgi-l">https://www.genecards.org/cgi-l</a> |
| FADD     | Fas Associ Protein Co   | 48 | GC11P070 | 1.689653 | <a href="https://www.genecards.org/cgi-l">https://www.genecards.org/cgi-l</a> |
| PHLDA2   | Pleckstrin I Protein Co | 39 | GC11M009 | 1.689653 | <a href="https://www.genecards.org/cgi-l">https://www.genecards.org/cgi-l</a> |
| TGFB1    | Transform Protein Co    | 55 | GC19M049 | 1.685504 | <a href="https://www.genecards.org/cgi-l">https://www.genecards.org/cgi-l</a> |
| HMCN1    | Hemicentil Protein Co   | 41 | GC01P185 | 1.685504 | <a href="https://www.genecards.org/cgi-l">https://www.genecards.org/cgi-l</a> |
| MMP2     | Matrix Me Protein Co    | 55 | GC16P055 | 1.672284 | <a href="https://www.genecards.org/cgi-l">https://www.genecards.org/cgi-l</a> |
| CEBPB    | CCAAT En Protein Co     | 45 | GC20P050 | 1.672284 | <a href="https://www.genecards.org/cgi-l">https://www.genecards.org/cgi-l</a> |
| CEMIP    | Cell Migra Protein Co   | 39 | GC15P080 | 1.672284 | <a href="https://www.genecards.org/cgi-l">https://www.genecards.org/cgi-l</a> |
| CDKN3    | Cyclin Dep Protein Co   | 44 | GC14P054 | 1.666558 | <a href="https://www.genecards.org/cgi-l">https://www.genecards.org/cgi-l</a> |
| CBL      | Cbl Proto- Protein Co   | 54 | GC11P119 | 1.654234 | <a href="https://www.genecards.org/cgi-l">https://www.genecards.org/cgi-l</a> |
| CASP9    | Caspase 9 Protein Co    | 49 | GC01M019 | 1.654234 | <a href="https://www.genecards.org/cgi-l">https://www.genecards.org/cgi-l</a> |
| SFN      | Stratifin Protein Co    | 48 | GC01P028 | 1.654234 | <a href="https://www.genecards.org/cgi-l">https://www.genecards.org/cgi-l</a> |
| MTDH     | Metadheri Protein Co    | 43 | GC08P097 | 1.654234 | <a href="https://www.genecards.org/cgi-l">https://www.genecards.org/cgi-l</a> |
| PRKCA    | Protein Kir Protein Co  | 53 | GC17P066 | 1.635414 | <a href="https://www.genecards.org/cgi-l">https://www.genecards.org/cgi-l</a> |
| TNFRSF10 | TNF Rece Protein Co     | 52 | GC08M029 | 1.635414 | <a href="https://www.genecards.org/cgi-l">https://www.genecards.org/cgi-l</a> |
| CXCL8    | C-X-C Mo Protein Co     | 44 | GC04P073 | 1.635414 | <a href="https://www.genecards.org/cgi-l">https://www.genecards.org/cgi-l</a> |
| MIR200C  | MicroRNA RNA Gene       | 26 | GC12P022 | 1.635414 | <a href="https://www.genecards.org/cgi-l">https://www.genecards.org/cgi-l</a> |
| AR       | Androgen Protein Co     | 54 | GC0XP067 | 1.618418 | <a href="https://www.genecards.org/cgi-l">https://www.genecards.org/cgi-l</a> |
| CDKN2A   | Cyclin Dep Protein Co   | 52 | GC09M029 | 1.615718 | <a href="https://www.genecards.org/cgi-l">https://www.genecards.org/cgi-l</a> |
| CPT1A    | Carnitine F Protein Co  | 51 | GC11M068 | 1.615718 | <a href="https://www.genecards.org/cgi-l">https://www.genecards.org/cgi-l</a> |
| PIK3CB   | Phosphatic Protein Co   | 50 | GC03M138 | 1.615718 | <a href="https://www.genecards.org/cgi-l">https://www.genecards.org/cgi-l</a> |
| CLDN1    | Claudin 1 Protein Co    | 48 | GC03M196 | 1.615718 | <a href="https://www.genecards.org/cgi-l">https://www.genecards.org/cgi-l</a> |
| MIR204   | MicroRNA RNA Gene       | 25 | GC09M076 | 1.615718 | <a href="https://www.genecards.org/cgi-l">https://www.genecards.org/cgi-l</a> |

|          |                        |    |          |          |                                                                               |
|----------|------------------------|----|----------|----------|-------------------------------------------------------------------------------|
| MIR26A1  | MicroRNA RNA Gene      | 23 | GC03P037 | 1.615718 | <a href="https://www.genecards.org/cgi-l">https://www.genecards.org/cgi-l</a> |
| CDKN1A   | Cyclin Dep Protein Co  | 51 | GC06P087 | 1.595009 | <a href="https://www.genecards.org/cgi-l">https://www.genecards.org/cgi-l</a> |
| CDKN1B   | Cyclin Dep Protein Co  | 50 | GC12P022 | 1.595009 | <a href="https://www.genecards.org/cgi-l">https://www.genecards.org/cgi-l</a> |
| KLF12    | KLF Transc Protein Co  | 40 | GC13M07  | 1.595009 | <a href="https://www.genecards.org/cgi-l">https://www.genecards.org/cgi-l</a> |
| NTRK1    | Neurotrop Protein Co   | 55 | GC01P156 | 1.573605 | <a href="https://www.genecards.org/cgi-l">https://www.genecards.org/cgi-l</a> |
| PLAU     | Plasminog Protein Co   | 55 | GC10P073 | 1.573115 | <a href="https://www.genecards.org/cgi-l">https://www.genecards.org/cgi-l</a> |
| MYC      | MYC Protc Protein Co   | 54 | GC08P127 | 1.573115 | <a href="https://www.genecards.org/cgi-l">https://www.genecards.org/cgi-l</a> |
| SMAD4    | SMAD Fan Protein Co    | 54 | GC18P051 | 1.573115 | <a href="https://www.genecards.org/cgi-l">https://www.genecards.org/cgi-l</a> |
| PLK1     | Polo Like 1 Protein Co | 53 | GC16P024 | 1.573115 | <a href="https://www.genecards.org/cgi-l">https://www.genecards.org/cgi-l</a> |
| MUC1     | Mucin 1, C Protein Co  | 51 | GC01M15  | 1.573115 | <a href="https://www.genecards.org/cgi-l">https://www.genecards.org/cgi-l</a> |
| LGALS1   | Galectin 1 Protein Co  | 45 | GC22P037 | 1.573115 | <a href="https://www.genecards.org/cgi-l">https://www.genecards.org/cgi-l</a> |
| PYCARD   | PYD And C Protein Co   | 44 | GC16M03  | 1.573115 | <a href="https://www.genecards.org/cgi-l">https://www.genecards.org/cgi-l</a> |
| SESN2    | Sestrin 2 Protein Co   | 40 | GC01P028 | 1.573115 | <a href="https://www.genecards.org/cgi-l">https://www.genecards.org/cgi-l</a> |
| ITGB3    | Integrin Su Protein Co | 55 | GC17P058 | 1.568464 | <a href="https://www.genecards.org/cgi-l">https://www.genecards.org/cgi-l</a> |
| KRAS     | KRAS Protc Protein Co  | 54 | GC12M02  | 1.568464 | <a href="https://www.genecards.org/cgi-l">https://www.genecards.org/cgi-l</a> |
| THBS1    | Thrombos Protein Co    | 48 | GC15P039 | 1.549803 | <a href="https://www.genecards.org/cgi-l">https://www.genecards.org/cgi-l</a> |
| BID      | BH3 Intera Protein Co  | 47 | GC22M01  | 1.549803 | <a href="https://www.genecards.org/cgi-l">https://www.genecards.org/cgi-l</a> |
| HRAS     | HRas Protc Protein Co  | 55 | GC11M00  | 1.535089 | <a href="https://www.genecards.org/cgi-l">https://www.genecards.org/cgi-l</a> |
| CDK11B   | Cyclin Dep Protein Co  | 43 | GC01M00  | 1.524758 | <a href="https://www.genecards.org/cgi-l">https://www.genecards.org/cgi-l</a> |
| CDK11A   | Cyclin Dep Protein Co  | 41 | GC01M00  | 1.524758 | <a href="https://www.genecards.org/cgi-l">https://www.genecards.org/cgi-l</a> |
| XIAP     | X-Linked I Protein Co  | 54 | GC0XP123 | 1.518128 | <a href="https://www.genecards.org/cgi-l">https://www.genecards.org/cgi-l</a> |
| PPARG    | Peroxisom Protein Co   | 55 | GC03P012 | 1.497523 | <a href="https://www.genecards.org/cgi-l">https://www.genecards.org/cgi-l</a> |
| IL6      | Interleukin Protein Co | 53 | GC07P022 | 1.497523 | <a href="https://www.genecards.org/cgi-l">https://www.genecards.org/cgi-l</a> |
| MIR145   | MicroRNA RNA Gene      | 25 | GC05P149 | 1.497523 | <a href="https://www.genecards.org/cgi-l">https://www.genecards.org/cgi-l</a> |
| CCR7     | C-C Motif Protein Co   | 47 | GC17M04  | 1.467398 | <a href="https://www.genecards.org/cgi-l">https://www.genecards.org/cgi-l</a> |
| MSLN     | Mesothelir Protein Co  | 45 | GC16P012 | 1.467398 | <a href="https://www.genecards.org/cgi-l">https://www.genecards.org/cgi-l</a> |
| RAC1     | Rac Family Protein Co  | 51 | GC07P006 | 1.461561 | <a href="https://www.genecards.org/cgi-l">https://www.genecards.org/cgi-l</a> |
| GRHL2    | Grainyhea Protein Co   | 43 | GC08P101 | 1.461561 | <a href="https://www.genecards.org/cgi-l">https://www.genecards.org/cgi-l</a> |
| BIRC3    | Baculovira Protein Co  | 48 | GC11P102 | 1.448279 | <a href="https://www.genecards.org/cgi-l">https://www.genecards.org/cgi-l</a> |
| NOTCH1   | Notch Rec Protein Co   | 55 | GC09M13  | 1.438149 | <a href="https://www.genecards.org/cgi-l">https://www.genecards.org/cgi-l</a> |
| RHOG     | Ras Homo Protein Co    | 43 | GC11M00  | 1.436139 | <a href="https://www.genecards.org/cgi-l">https://www.genecards.org/cgi-l</a> |
| CCAR2    | Cell Cycle Protein Co  | 39 | GC08P022 | 1.436139 | <a href="https://www.genecards.org/cgi-l">https://www.genecards.org/cgi-l</a> |
| NQO1     | NAD(P)H C Protein Co   | 50 | GC16M06  | 1.433205 | <a href="https://www.genecards.org/cgi-l">https://www.genecards.org/cgi-l</a> |
| MMP13    | Matrix Me Protein Co   | 54 | GC11M10  | 1.398545 | <a href="https://www.genecards.org/cgi-l">https://www.genecards.org/cgi-l</a> |
| FAS      | Fas Cell Su Protein Co | 53 | GC10P093 | 1.395647 | <a href="https://www.genecards.org/cgi-l">https://www.genecards.org/cgi-l</a> |
| MTA1     | Metastasis Protein Co  | 46 | GC14P105 | 1.395647 | <a href="https://www.genecards.org/cgi-l">https://www.genecards.org/cgi-l</a> |
| MYO5A    | Myosin VA Protein Co   | 47 | GC15M12  | 1.392646 | <a href="https://www.genecards.org/cgi-l">https://www.genecards.org/cgi-l</a> |
| EDA2R    | Ectodyspla Protein Co  | 45 | GC0XM06  | 1.392646 | <a href="https://www.genecards.org/cgi-l">https://www.genecards.org/cgi-l</a> |
| CCN6     | Cellular Cc Protein Co | 43 | GC06P112 | 1.392646 | <a href="https://www.genecards.org/cgi-l">https://www.genecards.org/cgi-l</a> |
| MMP9     | Matrix Me Protein Co   | 56 | GC20P046 | 1.374343 | <a href="https://www.genecards.org/cgi-l">https://www.genecards.org/cgi-l</a> |
| ABL1     | ABL Proto Protein Co   | 55 | GC09P130 | 1.374343 | <a href="https://www.genecards.org/cgi-l">https://www.genecards.org/cgi-l</a> |
| MAPK11   | Mitogen-1 Protein Co   | 51 | GC22M05  | 1.374343 | <a href="https://www.genecards.org/cgi-l">https://www.genecards.org/cgi-l</a> |
| SOD2     | Superoxid Protein Co   | 51 | GC06M15  | 1.374343 | <a href="https://www.genecards.org/cgi-l">https://www.genecards.org/cgi-l</a> |
| PTHLH    | Parathyroi Protein Co  | 48 | GC12M02  | 1.370602 | <a href="https://www.genecards.org/cgi-l">https://www.genecards.org/cgi-l</a> |
| PDGFB    | Platelet De Protein Co | 53 | GC22M06  | 1.353635 | <a href="https://www.genecards.org/cgi-l">https://www.genecards.org/cgi-l</a> |
| GLI2     | GLI Family Protein Co  | 51 | GC02P120 | 1.353635 | <a href="https://www.genecards.org/cgi-l">https://www.genecards.org/cgi-l</a> |
| EZH2     | Enhancer C Protein Co  | 56 | GC07M14  | 1.352577 | <a href="https://www.genecards.org/cgi-l">https://www.genecards.org/cgi-l</a> |
| RIPK1    | Receptor I Protein Co  | 51 | GC06P003 | 1.351373 | <a href="https://www.genecards.org/cgi-l">https://www.genecards.org/cgi-l</a> |
| CXCR4    | C-X-C Mo Protein Co    | 55 | GC02M13  | 1.343367 | <a href="https://www.genecards.org/cgi-l">https://www.genecards.org/cgi-l</a> |
| HMGA1    | High Mobi Protein Co   | 48 | GC06P087 | 1.331741 | <a href="https://www.genecards.org/cgi-l">https://www.genecards.org/cgi-l</a> |
| SIK2     | Salt Induci Protein Co | 48 | GC11P111 | 1.331741 | <a href="https://www.genecards.org/cgi-l">https://www.genecards.org/cgi-l</a> |
| TNFSF10  | TNF Super Protein Co   | 47 | GC03M17  | 1.331741 | <a href="https://www.genecards.org/cgi-l">https://www.genecards.org/cgi-l</a> |
| ANGPTL2  | Angiopoie Protein Co   | 40 | GC09M12  | 1.313242 | <a href="https://www.genecards.org/cgi-l">https://www.genecards.org/cgi-l</a> |
| S100A4   | S100 Calci Protein Co  | 48 | GC01M15  | 1.308429 | <a href="https://www.genecards.org/cgi-l">https://www.genecards.org/cgi-l</a> |
| NTF3     | Neurotrop Protein Co   | 47 | GC12P022 | 1.308429 | <a href="https://www.genecards.org/cgi-l">https://www.genecards.org/cgi-l</a> |
| ETV4     | ETS Varian Protein Co  | 45 | GC17M04  | 1.308429 | <a href="https://www.genecards.org/cgi-l">https://www.genecards.org/cgi-l</a> |
| MIR21    | MicroRNA RNA Gene      | 26 | GC17P059 | 1.308429 | <a href="https://www.genecards.org/cgi-l">https://www.genecards.org/cgi-l</a> |
| MIR124-1 | MicroRNA RNA Gene      | 21 | GC08M00  | 1.308429 | <a href="https://www.genecards.org/cgi-l">https://www.genecards.org/cgi-l</a> |

|          |                                |    |          |          |                                                                               |
|----------|--------------------------------|----|----------|----------|-------------------------------------------------------------------------------|
| HTRA1    | HtrA Serin Protein Co          | 48 | GC10P122 | 1.283384 | <a href="https://www.genecards.org/cgi-l">https://www.genecards.org/cgi-l</a> |
| LATS1    | Large Tum Protein Co           | 46 | GC06M149 | 1.283384 | <a href="https://www.genecards.org/cgi-l">https://www.genecards.org/cgi-l</a> |
| CEACAM3  | CEA Cell A Protein Co          | 45 | GC19P041 | 1.283384 | <a href="https://www.genecards.org/cgi-l">https://www.genecards.org/cgi-l</a> |
| EIF2AK3  | Eukaryotic Protein Co          | 51 | GC02M088 | 1.280375 | <a href="https://www.genecards.org/cgi-l">https://www.genecards.org/cgi-l</a> |
| LAMC2    | Laminin S $\alpha$ Protein Co  | 50 | GC01P183 | 1.280375 | <a href="https://www.genecards.org/cgi-l">https://www.genecards.org/cgi-l</a> |
| LAMA3    | Laminin S $\alpha$ Protein Co  | 48 | GC18P023 | 1.280375 | <a href="https://www.genecards.org/cgi-l">https://www.genecards.org/cgi-l</a> |
| LAMB3    | Laminin S $\alpha$ Protein Co  | 48 | GC01M209 | 1.280375 | <a href="https://www.genecards.org/cgi-l">https://www.genecards.org/cgi-l</a> |
| CDH2     | Cadherin 2 Protein Co          | 55 | GC18M027 | 1.260679 | <a href="https://www.genecards.org/cgi-l">https://www.genecards.org/cgi-l</a> |
| CSNK2A1  | Casein Kin Protein Co          | 53 | GC20M006 | 1.260679 | <a href="https://www.genecards.org/cgi-l">https://www.genecards.org/cgi-l</a> |
| EDIL3    | EGF Like R Protein Co          | 43 | GC05M088 | 1.260679 | <a href="https://www.genecards.org/cgi-l">https://www.genecards.org/cgi-l</a> |
| ZEB2     | Zinc Finge Protein Co          | 50 | GC02M144 | 1.256149 | <a href="https://www.genecards.org/cgi-l">https://www.genecards.org/cgi-l</a> |
| TLN1     | Talin 1 Protein Co             | 44 | GC09M039 | 1.256149 | <a href="https://www.genecards.org/cgi-l">https://www.genecards.org/cgi-l</a> |
| EPHA2    | EPH Receç Protein Co           | 56 | GC01M016 | 1.239971 | <a href="https://www.genecards.org/cgi-l">https://www.genecards.org/cgi-l</a> |
| SIRT3    | Sirtuin 3 Protein Co           | 50 | GC11M006 | 1.239971 | <a href="https://www.genecards.org/cgi-l">https://www.genecards.org/cgi-l</a> |
| OLFM3    | Olfactome Protein Co           | 40 | GC01M107 | 1.239971 | <a href="https://www.genecards.org/cgi-l">https://www.genecards.org/cgi-l</a> |
| CLU      | Clusterin Protein Co           | 50 | GC08M027 | 1.226024 | <a href="https://www.genecards.org/cgi-l">https://www.genecards.org/cgi-l</a> |
| SPINK1   | Serine Peç Protein Co          | 44 | GC05M147 | 1.226024 | <a href="https://www.genecards.org/cgi-l">https://www.genecards.org/cgi-l</a> |
| CPEB2    | Cytoplasm Protein Co           | 36 | GC04P018 | 1.226024 | <a href="https://www.genecards.org/cgi-l">https://www.genecards.org/cgi-l</a> |
| NAT1     | N-Acetyltr Protein Co          | 45 | GC08P018 | 1.218076 | <a href="https://www.genecards.org/cgi-l">https://www.genecards.org/cgi-l</a> |
| TSG101   | Tumor Sus Protein Co           | 45 | GC11M018 | 1.218076 | <a href="https://www.genecards.org/cgi-l">https://www.genecards.org/cgi-l</a> |
| MIR200A  | MicroRNA RNA Gene              | 22 | GC01P004 | 1.218076 | <a href="https://www.genecards.org/cgi-l">https://www.genecards.org/cgi-l</a> |
| MIR6744  | MicroRNA RNA Gene              | 9  | GC11P001 | 1.218076 | <a href="https://www.genecards.org/cgi-l">https://www.genecards.org/cgi-l</a> |
| SERPINA1 | Serpin Fan Protein Co          | 51 | GC14M094 | 1.212177 | <a href="https://www.genecards.org/cgi-l">https://www.genecards.org/cgi-l</a> |
| AKT3     | AKT Serine Protein Co          | 57 | GC01M247 | 1.194765 | <a href="https://www.genecards.org/cgi-l">https://www.genecards.org/cgi-l</a> |
| RELA     | RELA Prot Protein Co           | 54 | GC11M069 | 1.194765 | <a href="https://www.genecards.org/cgi-l">https://www.genecards.org/cgi-l</a> |
| TNFRSF1A | TNF Receç Protein Co           | 52 | GC12M006 | 1.194765 | <a href="https://www.genecards.org/cgi-l">https://www.genecards.org/cgi-l</a> |
| FASLG    | Fas Ligand Protein Co          | 50 | GC01P172 | 1.194765 | <a href="https://www.genecards.org/cgi-l">https://www.genecards.org/cgi-l</a> |
| AFP      | Alpha Fetc Protein Co          | 48 | GC04P073 | 1.194765 | <a href="https://www.genecards.org/cgi-l">https://www.genecards.org/cgi-l</a> |
| ITGA8    | Integrin S $\alpha$ Protein Co | 48 | GC10M019 | 1.194765 | <a href="https://www.genecards.org/cgi-l">https://www.genecards.org/cgi-l</a> |
| NOX4     | NADPH O $_2$ Protein Co        | 47 | GC11M089 | 1.194765 | <a href="https://www.genecards.org/cgi-l">https://www.genecards.org/cgi-l</a> |
| PBK      | PDZ Bindir Protein Co          | 47 | GC08M027 | 1.194765 | <a href="https://www.genecards.org/cgi-l">https://www.genecards.org/cgi-l</a> |
| SATB1    | SATB Horn Protein Co           | 47 | GC03M027 | 1.194765 | <a href="https://www.genecards.org/cgi-l">https://www.genecards.org/cgi-l</a> |
| CD63     | CD63 Mol Protein Co            | 45 | GC12M059 | 1.194765 | <a href="https://www.genecards.org/cgi-l">https://www.genecards.org/cgi-l</a> |
| EEF1A1   | Eukaryotic Protein Co          | 45 | GC06M077 | 1.194765 | <a href="https://www.genecards.org/cgi-l">https://www.genecards.org/cgi-l</a> |
| LTB4R2   | Leukotrien Protein Co          | 45 | GC14P033 | 1.194765 | <a href="https://www.genecards.org/cgi-l">https://www.genecards.org/cgi-l</a> |
| MAVS     | Mitochonc Protein Co           | 41 | GC20P004 | 1.194765 | <a href="https://www.genecards.org/cgi-l">https://www.genecards.org/cgi-l</a> |
| HRC      | Histidine R Protein Co         | 39 | GC19M049 | 1.194765 | <a href="https://www.genecards.org/cgi-l">https://www.genecards.org/cgi-l</a> |
| CCN2     | Cellular Cc Protein Co         | 48 | GC06M137 | 1.191831 | <a href="https://www.genecards.org/cgi-l">https://www.genecards.org/cgi-l</a> |
| RHOB     | Ras Homo Protein Co            | 47 | GC02P020 | 1.191831 | <a href="https://www.genecards.org/cgi-l">https://www.genecards.org/cgi-l</a> |
| PPP1R13B | Protein Ph Protein Co          | 40 | GC14M107 | 1.191831 | <a href="https://www.genecards.org/cgi-l">https://www.genecards.org/cgi-l</a> |
| PLG      | Plasminog Protein Co           | 52 | GC06P160 | 1.185631 | <a href="https://www.genecards.org/cgi-l">https://www.genecards.org/cgi-l</a> |
| MET      | MET Proto Protein Co           | 56 | GC07P116 | 1.184292 | <a href="https://www.genecards.org/cgi-l">https://www.genecards.org/cgi-l</a> |
| RAF1     | Raf-1 Prot Protein Co          | 57 | GC03M017 | 1.16972  | <a href="https://www.genecards.org/cgi-l">https://www.genecards.org/cgi-l</a> |
| PARP1    | Poly(ADP- Protein Co           | 53 | GC01M226 | 1.16972  | <a href="https://www.genecards.org/cgi-l">https://www.genecards.org/cgi-l</a> |
| PRKCQ    | Protein Kir Protein Co         | 51 | GC10M006 | 1.16972  | <a href="https://www.genecards.org/cgi-l">https://www.genecards.org/cgi-l</a> |
| BRCA2    | BRCA2 DN Protein Co            | 50 | GC13P032 | 1.16972  | <a href="https://www.genecards.org/cgi-l">https://www.genecards.org/cgi-l</a> |
| RB1      | RB Transcr Protein Co          | 50 | GC13P048 | 1.16972  | <a href="https://www.genecards.org/cgi-l">https://www.genecards.org/cgi-l</a> |
| SP1      | Sp1 Transc Protein Co          | 49 | GC12P053 | 1.16972  | <a href="https://www.genecards.org/cgi-l">https://www.genecards.org/cgi-l</a> |
| HAVCR2   | Hepatitis F Protein Co         | 48 | GC05M157 | 1.16972  | <a href="https://www.genecards.org/cgi-l">https://www.genecards.org/cgi-l</a> |
| DOCK1    | Dedicator Protein Co           | 47 | GC10P126 | 1.16972  | <a href="https://www.genecards.org/cgi-l">https://www.genecards.org/cgi-l</a> |
| VTN      | Vitronectin Protein Co         | 47 | GC17M044 | 1.16972  | <a href="https://www.genecards.org/cgi-l">https://www.genecards.org/cgi-l</a> |
| INHBB    | Inhibin Sul Protein Co         | 45 | GC02P123 | 1.16972  | <a href="https://www.genecards.org/cgi-l">https://www.genecards.org/cgi-l</a> |
| PDCD4    | Programm Protein Co            | 45 | GC10P110 | 1.16972  | <a href="https://www.genecards.org/cgi-l">https://www.genecards.org/cgi-l</a> |
| PRPF4B   | Pre-MRN $\beta$ Protein Co     | 44 | GC06P004 | 1.16972  | <a href="https://www.genecards.org/cgi-l">https://www.genecards.org/cgi-l</a> |
| RANBP9   | RAN Bindi Protein Co           | 44 | GC06M017 | 1.16972  | <a href="https://www.genecards.org/cgi-l">https://www.genecards.org/cgi-l</a> |
| SESN1    | Sestrin 1 Protein Co           | 43 | GC06M108 | 1.16972  | <a href="https://www.genecards.org/cgi-l">https://www.genecards.org/cgi-l</a> |
| SESN3    | Sestrin 3 Protein Co           | 41 | GC11M097 | 1.16972  | <a href="https://www.genecards.org/cgi-l">https://www.genecards.org/cgi-l</a> |
| CD24     | CD24 Mol Protein Co            | 40 | GC06M106 | 1.16972  | <a href="https://www.genecards.org/cgi-l">https://www.genecards.org/cgi-l</a> |

|         |                                |    |          |          |                                                                               |
|---------|--------------------------------|----|----------|----------|-------------------------------------------------------------------------------|
| ZBTB7A  | Zinc Finge Protein Co          | 40 | GC19M006 | 1.16972  | <a href="https://www.genecards.org/cgi-l">https://www.genecards.org/cgi-l</a> |
| MIR141  | MicroRNA RNA Gene              | 23 | GC12P022 | 1.16972  | <a href="https://www.genecards.org/cgi-l">https://www.genecards.org/cgi-l</a> |
| ELANE   | Elastase, N Protein Co         | 53 | GC19P003 | 1.151272 | <a href="https://www.genecards.org/cgi-l">https://www.genecards.org/cgi-l</a> |
| KDR     | Kinase Inse Protein Co         | 56 | GC04M059 | 1.142485 | <a href="https://www.genecards.org/cgi-l">https://www.genecards.org/cgi-l</a> |
| MDM2    | MDM2 Prc Protein Co            | 55 | GC12P068 | 1.142485 | <a href="https://www.genecards.org/cgi-l">https://www.genecards.org/cgi-l</a> |
| NFE2L2  | NFE2 Like Protein Co           | 53 | GC02M177 | 1.142485 | <a href="https://www.genecards.org/cgi-l">https://www.genecards.org/cgi-l</a> |
| ZEB1    | Zinc Finge Protein Co          | 51 | GC10P031 | 1.142485 | <a href="https://www.genecards.org/cgi-l">https://www.genecards.org/cgi-l</a> |
| KL      | Klotho Protein Co              | 50 | GC13P033 | 1.142485 | <a href="https://www.genecards.org/cgi-l">https://www.genecards.org/cgi-l</a> |
| PRKCI   | Protein Kir Protein Co         | 50 | GC03P170 | 1.142485 | <a href="https://www.genecards.org/cgi-l">https://www.genecards.org/cgi-l</a> |
| CRYAB   | Crystallin $\gamma$ Protein Co | 48 | GC11M117 | 1.142485 | <a href="https://www.genecards.org/cgi-l">https://www.genecards.org/cgi-l</a> |
| EPHB6   | EPH Recep Protein Co           | 48 | GC07P148 | 1.142485 | <a href="https://www.genecards.org/cgi-l">https://www.genecards.org/cgi-l</a> |
| FGF2    | Fibroblast Protein Co          | 48 | GC04P122 | 1.142485 | <a href="https://www.genecards.org/cgi-l">https://www.genecards.org/cgi-l</a> |
| HK2     | Hexokinas Protein Co           | 48 | GC02P074 | 1.142485 | <a href="https://www.genecards.org/cgi-l">https://www.genecards.org/cgi-l</a> |
| LTF     | Lactotrans Protein Co          | 48 | GC03M046 | 1.142485 | <a href="https://www.genecards.org/cgi-l">https://www.genecards.org/cgi-l</a> |
| IQGAP1  | IQ Motif C Protein Co          | 46 | GC15P090 | 1.142485 | <a href="https://www.genecards.org/cgi-l">https://www.genecards.org/cgi-l</a> |
| MGAT5   | Alpha-1,6 Protein Co           | 44 | GC02P134 | 1.142485 | <a href="https://www.genecards.org/cgi-l">https://www.genecards.org/cgi-l</a> |
| SDCBP   | Syndecan Protein Co            | 44 | GC08P058 | 1.142485 | <a href="https://www.genecards.org/cgi-l">https://www.genecards.org/cgi-l</a> |
| ABHD2   | Abhydrola Protein Co           | 42 | GC15P089 | 1.142485 | <a href="https://www.genecards.org/cgi-l">https://www.genecards.org/cgi-l</a> |
| SPIB    | Spi-B Tran Protein Co          | 41 | GC19P050 | 1.142485 | <a href="https://www.genecards.org/cgi-l">https://www.genecards.org/cgi-l</a> |
| TRIM31  | Tripartite $\beta$ Protein Co  | 40 | GC06M069 | 1.142485 | <a href="https://www.genecards.org/cgi-l">https://www.genecards.org/cgi-l</a> |
| MIR1827 | MicroRNA RNA Gene              | 13 | GC12P100 | 1.142485 | <a href="https://www.genecards.org/cgi-l">https://www.genecards.org/cgi-l</a> |
| PDGFRB  | Platelet De Protein Co         | 56 | GC05M156 | 1.11236  | <a href="https://www.genecards.org/cgi-l">https://www.genecards.org/cgi-l</a> |
| PLAT    | Plasminog Protein Co           | 54 | GC08M047 | 1.11236  | <a href="https://www.genecards.org/cgi-l">https://www.genecards.org/cgi-l</a> |
| TLR3    | Toll Like R Protein Co         | 54 | GC04P186 | 1.11236  | <a href="https://www.genecards.org/cgi-l">https://www.genecards.org/cgi-l</a> |
| NRAS    | NRAS Prot Protein Co           | 53 | GC01M114 | 1.11236  | <a href="https://www.genecards.org/cgi-l">https://www.genecards.org/cgi-l</a> |
| ROCK1   | Rho Assoc Protein Co           | 52 | GC18M026 | 1.11236  | <a href="https://www.genecards.org/cgi-l">https://www.genecards.org/cgi-l</a> |
| PAK4    | P21 (RAC1 Protein Co           | 51 | GC19P039 | 1.11236  | <a href="https://www.genecards.org/cgi-l">https://www.genecards.org/cgi-l</a> |
| VEGFA   | Vascular E Protein Co          | 51 | GC06P043 | 1.11236  | <a href="https://www.genecards.org/cgi-l">https://www.genecards.org/cgi-l</a> |
| CASP10  | Caspase 10 Protein Co          | 50 | GC02P201 | 1.11236  | <a href="https://www.genecards.org/cgi-l">https://www.genecards.org/cgi-l</a> |
| PIN1    | Peptidylpr Protein Co          | 50 | GC19P009 | 1.11236  | <a href="https://www.genecards.org/cgi-l">https://www.genecards.org/cgi-l</a> |
| IL1RAP  | Interleukin Protein Co         | 48 | GC03P190 | 1.11236  | <a href="https://www.genecards.org/cgi-l">https://www.genecards.org/cgi-l</a> |
| UBE2C   | Ubiquitin ( Protein Co         | 48 | GC20P045 | 1.11236  | <a href="https://www.genecards.org/cgi-l">https://www.genecards.org/cgi-l</a> |
| YWHAZ   | Tyrosine 3 Protein Co          | 48 | GC08M106 | 1.11236  | <a href="https://www.genecards.org/cgi-l">https://www.genecards.org/cgi-l</a> |
| TWIST1  | Twist Fami Protein Co          | 47 | GC07M019 | 1.11236  | <a href="https://www.genecards.org/cgi-l">https://www.genecards.org/cgi-l</a> |
| BMP6    | Bone Morp Protein Co           | 46 | GC06P007 | 1.11236  | <a href="https://www.genecards.org/cgi-l">https://www.genecards.org/cgi-l</a> |
| BNIP3L  | BCL2 Inter Protein Co          | 45 | GC08P026 | 1.11236  | <a href="https://www.genecards.org/cgi-l">https://www.genecards.org/cgi-l</a> |
| ELK1    | ETS Transc Protein Co          | 45 | GC0XM047 | 1.11236  | <a href="https://www.genecards.org/cgi-l">https://www.genecards.org/cgi-l</a> |
| KDM3A   | Lysine Der Protein Co          | 44 | GC02P086 | 1.11236  | <a href="https://www.genecards.org/cgi-l">https://www.genecards.org/cgi-l</a> |
| PRDX4   | Peroxiredc Protein Co          | 44 | GC0XP023 | 1.11236  | <a href="https://www.genecards.org/cgi-l">https://www.genecards.org/cgi-l</a> |
| BNIP3   | BCL2 Inter Protein Co          | 43 | GC10M137 | 1.11236  | <a href="https://www.genecards.org/cgi-l">https://www.genecards.org/cgi-l</a> |
| LMO3    | LIM Doma Protein Co            | 41 | GC12M016 | 1.11236  | <a href="https://www.genecards.org/cgi-l">https://www.genecards.org/cgi-l</a> |
| ZNF32   | Zinc Finge Protein Co          | 36 | GC10M047 | 1.11236  | <a href="https://www.genecards.org/cgi-l">https://www.genecards.org/cgi-l</a> |
| MIR200B | MicroRNA RNA Gene              | 23 | GC01P001 | 1.11236  | <a href="https://www.genecards.org/cgi-l">https://www.genecards.org/cgi-l</a> |
| MIR525  | MicroRNA RNA Gene              | 19 | GC19P053 | 1.11236  | <a href="https://www.genecards.org/cgi-l">https://www.genecards.org/cgi-l</a> |
| MIR363  | MicroRNA RNA Gene              | 18 | GC0XM137 | 1.11236  | <a href="https://www.genecards.org/cgi-l">https://www.genecards.org/cgi-l</a> |
| TUBB3   | Tubulin Be Protein Co          | 51 | GC16P091 | 1.098414 | <a href="https://www.genecards.org/cgi-l">https://www.genecards.org/cgi-l</a> |
| HSP90B1 | Heat Shoc Protein Co           | 50 | GC12P103 | 1.098414 | <a href="https://www.genecards.org/cgi-l">https://www.genecards.org/cgi-l</a> |
| SLC2A1  | Solute Car Protein Co          | 56 | GC01M047 | 1.078167 | <a href="https://www.genecards.org/cgi-l">https://www.genecards.org/cgi-l</a> |
| HMOX1   | Heme Oxy Protein Co            | 55 | GC22P035 | 1.078167 | <a href="https://www.genecards.org/cgi-l">https://www.genecards.org/cgi-l</a> |
| PTPN11  | Protein Ty Protein Co          | 55 | GC12P112 | 1.078167 | <a href="https://www.genecards.org/cgi-l">https://www.genecards.org/cgi-l</a> |
| PRKACA  | Protein Kir Protein Co         | 54 | GC19M014 | 1.078167 | <a href="https://www.genecards.org/cgi-l">https://www.genecards.org/cgi-l</a> |
| PAK3    | P21 (RAC1 Protein Co           | 53 | GC0XP110 | 1.078167 | <a href="https://www.genecards.org/cgi-l">https://www.genecards.org/cgi-l</a> |
| CD36    | CD36 Molc Protein Co           | 52 | GC07P080 | 1.078167 | <a href="https://www.genecards.org/cgi-l">https://www.genecards.org/cgi-l</a> |
| PIK3R2  | Phosphoin Protein Co           | 52 | GC19P018 | 1.078167 | <a href="https://www.genecards.org/cgi-l">https://www.genecards.org/cgi-l</a> |
| PPP2CA  | Protein Ph Protein Co          | 52 | GC05M137 | 1.078167 | <a href="https://www.genecards.org/cgi-l">https://www.genecards.org/cgi-l</a> |
| CASP6   | Caspase 6 Protein Co           | 51 | GC04M109 | 1.078167 | <a href="https://www.genecards.org/cgi-l">https://www.genecards.org/cgi-l</a> |
| CDH3    | Cadherin $\epsilon$ Protein Co | 50 | GC16P068 | 1.078167 | <a href="https://www.genecards.org/cgi-l">https://www.genecards.org/cgi-l</a> |
| EEF2K   | Eukaryotic Protein Co          | 50 | GC16P022 | 1.078167 | <a href="https://www.genecards.org/cgi-l">https://www.genecards.org/cgi-l</a> |

|          |                         |    |          |          |                                                                               |
|----------|-------------------------|----|----------|----------|-------------------------------------------------------------------------------|
| LRP1     | LDL Recep Protein Co    | 50 | GC12P057 | 1.078167 | <a href="https://www.genecards.org/cgi-l">https://www.genecards.org/cgi-l</a> |
| PAK2     | P21 (RAC1 Protein Co    | 50 | GC03P196 | 1.078167 | <a href="https://www.genecards.org/cgi-l">https://www.genecards.org/cgi-l</a> |
| PTK6     | Protein Ty Protein Co   | 50 | GC20M06  | 1.078167 | <a href="https://www.genecards.org/cgi-l">https://www.genecards.org/cgi-l</a> |
| LPAR1    | Lysophosç Protein Co    | 49 | GC09M11  | 1.078167 | <a href="https://www.genecards.org/cgi-l">https://www.genecards.org/cgi-l</a> |
| TCF7L2   | Transcripti Protein Co  | 49 | GC10P112 | 1.078167 | <a href="https://www.genecards.org/cgi-l">https://www.genecards.org/cgi-l</a> |
| CEACAM1  | CEA Cell A Protein Co   | 48 | GC19M04  | 1.078167 | <a href="https://www.genecards.org/cgi-l">https://www.genecards.org/cgi-l</a> |
| GDF2     | Growth Di Protein Co    | 47 | GC10P047 | 1.078167 | <a href="https://www.genecards.org/cgi-l">https://www.genecards.org/cgi-l</a> |
| GLO1     | Glyoxalase Protein Co   | 47 | GC06M06  | 1.078167 | <a href="https://www.genecards.org/cgi-l">https://www.genecards.org/cgi-l</a> |
| IL17A    | Interleukin Protein Co  | 47 | GC06P052 | 1.078167 | <a href="https://www.genecards.org/cgi-l">https://www.genecards.org/cgi-l</a> |
| RBL2     | RB Transcr Protein Co   | 47 | GC16P053 | 1.078167 | <a href="https://www.genecards.org/cgi-l">https://www.genecards.org/cgi-l</a> |
| SIRPA    | Signal Reg Protein Co   | 47 | GC20P001 | 1.078167 | <a href="https://www.genecards.org/cgi-l">https://www.genecards.org/cgi-l</a> |
| TRAF2    | TNF Receç Protein Co    | 47 | GC09P136 | 1.078167 | <a href="https://www.genecards.org/cgi-l">https://www.genecards.org/cgi-l</a> |
| ADCY10   | Adenylate Protein Co    | 46 | GC01M16  | 1.078167 | <a href="https://www.genecards.org/cgi-l">https://www.genecards.org/cgi-l</a> |
| VPS37A   | VPS37A Sç Protein Co    | 45 | GC08P017 | 1.078167 | <a href="https://www.genecards.org/cgi-l">https://www.genecards.org/cgi-l</a> |
| TNFRSF12 | TNF Receç Protein Co    | 44 | GC16P003 | 1.078167 | <a href="https://www.genecards.org/cgi-l">https://www.genecards.org/cgi-l</a> |
| APOBEC3C | Apolipopri Protein Co   | 43 | GC22P041 | 1.078167 | <a href="https://www.genecards.org/cgi-l">https://www.genecards.org/cgi-l</a> |
| BAG1     | BAG Coch Protein Co     | 43 | GC09M03  | 1.078167 | <a href="https://www.genecards.org/cgi-l">https://www.genecards.org/cgi-l</a> |
| COL13A1  | Collagen T Protein Co   | 43 | GC10P069 | 1.078167 | <a href="https://www.genecards.org/cgi-l">https://www.genecards.org/cgi-l</a> |
| MNX1     | Motor Neu Protein Co    | 43 | GC07M15  | 1.078167 | <a href="https://www.genecards.org/cgi-l">https://www.genecards.org/cgi-l</a> |
| RAD9A    | RAD9 Che Protein Co     | 42 | GC11P070 | 1.078167 | <a href="https://www.genecards.org/cgi-l">https://www.genecards.org/cgi-l</a> |
| IFI27    | Interferon Protein Co   | 40 | GC14P094 | 1.078167 | <a href="https://www.genecards.org/cgi-l">https://www.genecards.org/cgi-l</a> |
| MEGF11   | Multiple E Protein Co   | 40 | GC15M06  | 1.078167 | <a href="https://www.genecards.org/cgi-l">https://www.genecards.org/cgi-l</a> |
| ITPRIP   | Inositol 1,4 Protein Co | 39 | GC10M10  | 1.078167 | <a href="https://www.genecards.org/cgi-l">https://www.genecards.org/cgi-l</a> |
| BCL2L15  | BCL2 Like Protein Co    | 34 | GC01M11  | 1.078167 | <a href="https://www.genecards.org/cgi-l">https://www.genecards.org/cgi-l</a> |
| SNAI2    | Snail Famil Protein Co  | 48 | GC08M04  | 1.050075 | <a href="https://www.genecards.org/cgi-l">https://www.genecards.org/cgi-l</a> |
| PTPN1    | Protein Ty Protein Co   | 54 | GC20P050 | 1.037607 | <a href="https://www.genecards.org/cgi-l">https://www.genecards.org/cgi-l</a> |
| NOTCH3   | Notch Rec Protein Co    | 53 | GC19M01  | 1.037607 | <a href="https://www.genecards.org/cgi-l">https://www.genecards.org/cgi-l</a> |
| GLUD1    | Glutamate Protein Co    | 52 | GC10M08  | 1.037607 | <a href="https://www.genecards.org/cgi-l">https://www.genecards.org/cgi-l</a> |
| SIRT1    | Sirtuin 1 Protein Co    | 52 | GC10P067 | 1.037607 | <a href="https://www.genecards.org/cgi-l">https://www.genecards.org/cgi-l</a> |
| FASN     | Fatty Acid Protein Co   | 51 | GC17M08  | 1.037607 | <a href="https://www.genecards.org/cgi-l">https://www.genecards.org/cgi-l</a> |
| MYH9     | Myosin He Protein Co    | 51 | GC22M03  | 1.037607 | <a href="https://www.genecards.org/cgi-l">https://www.genecards.org/cgi-l</a> |
| RPS6KB1  | Ribosomal Protein Co    | 51 | GC17P059 | 1.037607 | <a href="https://www.genecards.org/cgi-l">https://www.genecards.org/cgi-l</a> |
| TPM1     | Tropomyo Protein Co     | 51 | GC15P123 | 1.037607 | <a href="https://www.genecards.org/cgi-l">https://www.genecards.org/cgi-l</a> |
| PPP2R1A  | Protein Ph Protein Co   | 50 | GC19P070 | 1.037607 | <a href="https://www.genecards.org/cgi-l">https://www.genecards.org/cgi-l</a> |
| COL4A2   | Collagen T Protein Co   | 49 | GC13P110 | 1.037607 | <a href="https://www.genecards.org/cgi-l">https://www.genecards.org/cgi-l</a> |
| CTNND1   | Catenin D Protein Co    | 48 | GC11P058 | 1.037607 | <a href="https://www.genecards.org/cgi-l">https://www.genecards.org/cgi-l</a> |
| CD151    | CD151 Mc Protein Co     | 47 | GC11P001 | 1.037607 | <a href="https://www.genecards.org/cgi-l">https://www.genecards.org/cgi-l</a> |
| MMP11    | Matrix Me Protein Co    | 47 | GC22P023 | 1.037607 | <a href="https://www.genecards.org/cgi-l">https://www.genecards.org/cgi-l</a> |
| ARHGEF7  | Rho Guani Protein Co    | 45 | GC13P111 | 1.037607 | <a href="https://www.genecards.org/cgi-l">https://www.genecards.org/cgi-l</a> |
| PPP2R2A  | Protein Ph Protein Co   | 45 | GC08P026 | 1.037607 | <a href="https://www.genecards.org/cgi-l">https://www.genecards.org/cgi-l</a> |
| SEMA7A   | Semaphor Protein Co     | 45 | GC15M07  | 1.037607 | <a href="https://www.genecards.org/cgi-l">https://www.genecards.org/cgi-l</a> |
| PPP2R5A  | Protein Ph Protein Co   | 43 | GC01P212 | 1.037607 | <a href="https://www.genecards.org/cgi-l">https://www.genecards.org/cgi-l</a> |
| BST2     | Bone Marr Protein Co    | 42 | GC19M01  | 1.037607 | <a href="https://www.genecards.org/cgi-l">https://www.genecards.org/cgi-l</a> |
| CCN1     | Cellular Cc Protein Co  | 41 | GC01P085 | 1.037607 | <a href="https://www.genecards.org/cgi-l">https://www.genecards.org/cgi-l</a> |
| PPP2R2D  | Protein Ph Protein Co   | 37 | GC10P131 | 1.037607 | <a href="https://www.genecards.org/cgi-l">https://www.genecards.org/cgi-l</a> |
| CCDC178  | Coiled-Co Protein Co    | 31 | GC18M03  | 1.037607 | <a href="https://www.genecards.org/cgi-l">https://www.genecards.org/cgi-l</a> |
| MIR10A   | MicroRNA RNA Gene       | 23 | GC17M04  | 1.037607 | <a href="https://www.genecards.org/cgi-l">https://www.genecards.org/cgi-l</a> |
| MIR30B   | MicroRNA RNA Gene       | 23 | GC08M13  | 1.037607 | <a href="https://www.genecards.org/cgi-l">https://www.genecards.org/cgi-l</a> |
| MIR30C1  | MicroRNA RNA Gene       | 23 | GC01P040 | 1.037607 | <a href="https://www.genecards.org/cgi-l">https://www.genecards.org/cgi-l</a> |
| SHC1     | SHC Adap Protein Co     | 46 | GC01M15  | 1.016699 | <a href="https://www.genecards.org/cgi-l">https://www.genecards.org/cgi-l</a> |
| AFAP1L1  |                         |    |          |          |                                                                               |
| CHUK     |                         |    |          |          |                                                                               |
| CMA1     |                         |    |          |          |                                                                               |
| COPS5    |                         |    |          |          |                                                                               |
| DLG1     |                         |    |          |          |                                                                               |
| FER      |                         |    |          |          |                                                                               |
| HOXA10   |                         |    |          |          |                                                                               |
| IKZF3    |                         |    |          |          |                                                                               |

NRP1  
PECAM1  
PRKD1  
RHOC  
SCRIB  
SH3GLB1  
SLCO1B3  
TAGLN  
UCHL1  
USP9X  
WNT2

<bin/carddisp.pl?gene=CEACAM6>

<bin/carddisp.pl?gene=CEACAM5>

<bin/carddisp.pl?gene=ANKRD13C>



[bin/carddisp.pl?gene=FBXW7-AS1](#)

[bin/carddisp.pl?gene=TNFRSF10B](#)



[bin/carddisp.pl?gene=CEACAM3](#)

[bin/carddisp.pl?gene=SERPINA1](#)

[bin/carddisp.pl?gene=TNFRSF1A](#)

[bin/carddisp.pl?gene=PPP1R13B](#)



<bin/carddisp.pl?gene=CEACAM1>

<bin/carddisp.pl?gene=TNFRSF12A>  
<bin/carddisp.pl?gene=APOBEC3G>
